# Supplementary material
Source: PubMed Central journal article supplement (PMC4597801)
Supplement: supp_kwv115_kwv115supp.pdf [file supp_kwv115_kwv115supp.pdf]

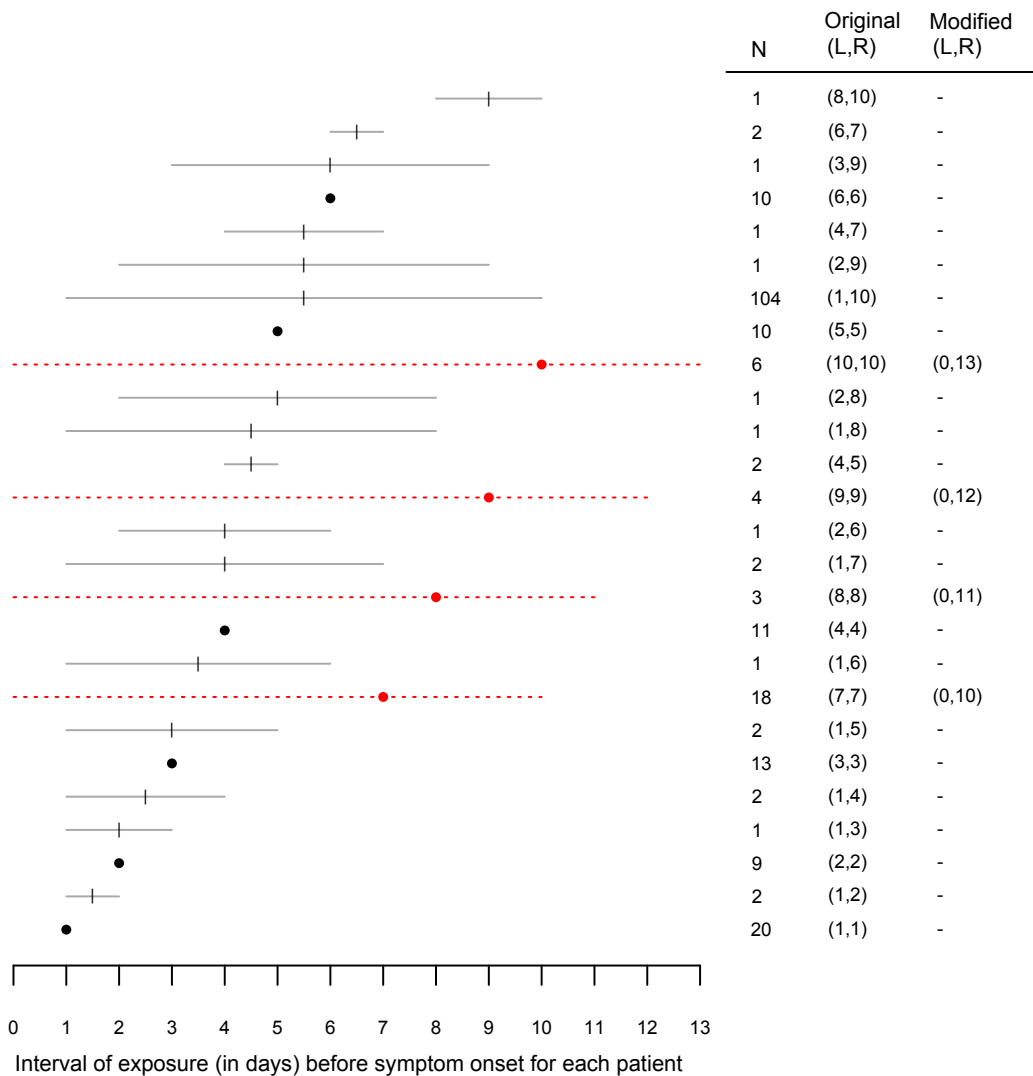

**Web Figure 1. Raw data on exposures, and description of the adjustment of longer single exposures for 31/229 patients (14%) included in the data set.** The scale is inverted, where 0 corresponds to the day of illness onset for each patient, and higher numbers on the x-axis indicate earlier exposures. The red lines show the patients with single exposures reported at 7 days or longer, represented with red points, and the adjustments made prior to analysis (red dotted lines).

**Web Table 1. Alternative parametric estimates of the mean of the incubation distribution based on all available data (N=229).**

| Distribution                                                     | Mean (days) |                     | 95th percentile (days) |                     | 99th percentile (days) |                     | AIC |
|------------------------------------------------------------------|-------------|---------------------|------------------------|---------------------|------------------------|---------------------|-----|
|                                                                  | Estimate    | 95% CI <sup>1</sup> | Estimate               | 95% CI <sup>1</sup> | Estimate               | 95% CI <sup>1</sup> |     |
| <b>Modified data*</b>                                            |             |                     |                        |                     |                        |                     |     |
| Weibull                                                          | 4.1         | (3.7 - 4.5)         | 7.9                    | (7.2 - 8.5)         | 9.7                    | (8.8 - 10.5)        | 400 |
| Gamma                                                            | 4.0         | (3.6-4.4)           | 8.4                    | (7.7 - 9.0)         | 11.1                   | (10.2 - 12.1)       | 406 |
| Lognormal                                                        | 4.0         | (3.6 - 4.4)         | 9.1                    | (8.3 - 9.9)         | 13.8                   | (12.3 - 15.5)       | 422 |
| Log-logistic                                                     | 4.3         | (3.9 - 4.7)         | 9.8                    | (8.8 - 10.8)        | 17.4                   | (14.8 - 20.2)       | 429 |
| Exponential                                                      | 3.9         | (3.6 - 4.2)         | 11.7                   | (10.8 - 12.6)       | 17.8                   | (16.6 - 19.4)       | 489 |
| <b>Without exact exposure dates (7, 8, 9 and 10 days, N=198)</b> |             |                     |                        |                     |                        |                     |     |
| Weibull                                                          | 3.4         | (3.0 - 3.7)         | 6.5                    | (5.9 - 7.1)         | 8.0                    | (7.2 - 8.8)         | 326 |
| Gamma                                                            | 3.3         | (2.9 - 3.7)         | 6.8                    | (6.1 - 7.4)         | 9.0                    | (8.1 - 9.9)         | 328 |
| Lognormal                                                        | 3.3         | (2.9 - 3.6)         | 7.3                    | (6.5 - 8.0)         | 10.9                   | (9.6 - 12.2)        | 314 |
| Log-logistic                                                     | 3.5         | (3.0 - 3.9)         | 7.8                    | (6.9 - 8.7)         | 13.8                   | (11.8 - 15.9)       | 345 |
| Exponential                                                      | 3.3         | (3.0 - 3.5)         | 9.8                    | (9.1 - 10.5)        | 15.1                   | (13.9 - 16.1)       | 403 |

*\*Modified data are the data where exact reported exposures of 7, 8, 9 or 10 days were modified to exposures on [4,10], [5,11], [6,12] or [7,13] days, respectively.*

<sup>1</sup> 95% CIs calculated by bootstrapping with 10,000 repetitions.

AIC: Akaike Information Criterion.
